# Supplementary material for: Exploring human factors in the operating room: a protocol for a scoping review of training offerings for healthcare professionals
Source: HighWire-hosted journal article supplement (doi:10.1136/bmjopen-2020-044721), 2021-06-01
Supplement: bmjopen-2020-044721supp001_data_supplement.pdf [file bmjopen-2020-044721supp001_data_supplement.pdf]

## Supplementary Appendix A

### MEDLINE Search Strategy:

-----

1 human factor\*.mp. [mp=title, abstract, original title, name of substance word, subject heading word, floating sub-heading word, keyword heading word, organism supplementary concept word, protocol supplementary concept word, rare disease supplementary concept word, unique identifier, synonyms] (7356)

2 Operating Rooms/ (13800)

3 exp Intraoperative Period/ (28079)

4 Intraoperative Care/ (16915)

5 exp Monitoring, Intraoperative/ (19979)

6 exp Specialties, Surgical/ (198693)

7 (operating room\* or operating theatre\* or operating theater\* or operating table\*).mp. [mp=title, abstract, original title, name of substance word, subject heading word, floating sub-heading word, keyword heading word, organism supplementary concept word, protocol supplementary concept word, rare disease supplementary concept word, unique identifier, synonyms] (45816)

8 (intraoperative or intra-operative).mp. [mp=title, abstract, original title, name of substance word, subject heading word, floating sub-heading word, keyword heading word, organism supplementary concept word, protocol supplementary concept word, rare disease supplementary concept word, unique identifier, synonyms] (178632)

9 surg\*.mp. [mp=title, abstract, original title, name of substance word, subject heading word, floating sub-heading word, keyword heading word, organism supplementary concept word, protocol supplementary concept word, rare disease supplementary concept word, unique identifier, synonyms] (3143000)

10 2 or 3 or 4 or 5 or 6 or 7 or 8 or 9 (3268944)

11 1 and 10 (758)

12 exp Education/ (806872)

13 exp Learning/ (383825)

14 exp Surgeons/ed [Education] (932)

15 exp Anesthetists/ed [Education] (798)

16 exp Nurses/ed [Education] (8375)

17 exp Nurse Specialists/ed [Education] (3921)

18 exp Nursing Staff/ed [Education] (14446)

19 (train\* or educat\* or teach\* or learn\* or intervention? or curricul\* or program\* or course\* or coach\* or workshop\* or lecture\* or class\* or lesson\* or mentor\*).mp. [mp=title, abstract, original title, name of substance word, subject heading word, floating sub-heading word, keyword heading word, organism supplementary concept word, protocol supplementary concept word, rare disease supplementary concept word, unique identifier, synonyms] (5385200)

20 (drill\* or exercise\* or school\* or instruction\* or apprentice\*).mp. [mp=title, abstract, original title, name of substance word, subject heading word, floating subheading word, keyword heading word, organism supplementary concept word, protocol supplementary concept word, rare disease supplementary concept word, unique identifier, synonyms] (772976)

21 12 or 13 or 14 or 15 or 16 or 17 or 18 or 19 or 20 (5972972)

22 11 and 21 (482)

\*\*\*\*\*
